1           **Genome-wide identification and characterization of DNA/RNA differences**  
2                           **associated with *Fusarium graminearum* infection in wheat**

3                           Running title: RNA editome associated with FHB in wheat

4

5   Guang Yang<sup>1</sup>, Yan Pan<sup>1</sup>, Ruoyu Zhang<sup>1</sup>, Jiaqian Huang<sup>1</sup>, Wenqiu Pan<sup>1</sup>, Licao Cui<sup>2</sup>,  
6   Weining Song<sup>1\*</sup>, Xiaojun Nie<sup>1\*</sup>

7

8   <sup>1</sup>State Key Laboratory of Crop Stress Biology in Arid Areas, College of Agronomy,  
9   Northwest A&F University, Yangling, Shaanxi 712100, China;

10   <sup>2</sup>College of Life Science, Jiangxi Agricultural University, Nanchang330045, Jiangxi,  
11   China

12

13   Corresponding author:

14   Weining Song: [sweining2002@yahoo.com](mailto:sweining2002@yahoo.com); Xiaojun Nie: [small@nwsuaf.edu.cn](mailto:small@nwsuaf.edu.cn)

15

16 **Abbreviations**

|    |           |                                              |
|----|-----------|----------------------------------------------|
| 17 | <i>Fg</i> | <i>Fusarium graminearum</i>                  |
| 18 | FHB       | Fusarium head blight                         |
| 19 | WGCNA     | Weighted gene co-expression network analysis |
| 20 | dpi       | Days post inoculation                        |
| 21 | DEG       | Differentially expressed gene                |
| 22 | DEEG      | Differential expressed edited gene           |
| 23 | GAPDH     | Glyceraldehyde-3-phosphate dehydrogenase     |
| 24 | DON       | Deoxynivalenol                               |
| 25 | MFE       | Minimum free energy                          |
| 26 | TSS       | Translational start site                     |
| 27 | GO        | Gene ontology                                |
| 28 | KEGG      | Kyoto encyclopedia of genes and genomes      |
| 29 |           |                                              |

30 **Abstract**

31 RNA editing (DNA/RNA differences) as a post-transcriptional modification approach  
32 to enrich genetic information, plays the crucial role in regulating diverse biological  
33 processes in eukaryotes. Although it has been extensively studied in plant chloroplast  
34 and mitochondria genome, RNA editing in plant nuclear genome, especially those  
35 associated with Fusarium head blight (FHB), is not well studied at present. Here, we  
36 investigated the DNA/RNA differences associated with FHB through a novel method  
37 by comparing the RNA-seq data from *Fusarium*-infected and control samples from 4  
38 wheat genotypes. A total of 187 DNA/RNA differences were identified in 36 wheat  
39 genes, representing the first landscape of the FHB-responsive RNA editome in wheat.  
40 Furthermore, all of these 36 edited genes were located in the FHB related  
41 co-expression gene modules, which may involve in regulating FHB response. Finally,  
42 the effects of DNA/RNA differences were systematically investigated to show that  
43 they could cause the change of RNA structure and protein structure in edited genes. In  
44 particular, the G to C editing (chr3A\_487854715) in TraesCS3A02G263900, which is  
45 the orthology of *OsRACK1*, resulted that it was targeted by *tae-miR9664-3p* to control  
46 its expression in different genotype through different editing efficiency, suggesting  
47 RNA editing could mediate miRNA to participate in the regulation network of FHB  
48 tolerance. This study reported the first wheat DNA/RNA differences associated with  
49 FHB, which not only contribute to better understand the molecular basis underlying  
50 FHB tolerance, but also shed light on improving FHB tolerance through epigenetic  
51 method in wheat and beyond.

52 **Keywords** Wheat · DNA/RNA differences · Fusarium head blight  
53 (FHB) · Weighted correlation network analysis (WGCNA) · RNA secondary  
54 structure

## 55 **Introduction**

56 Wheat is considered as one of the most important staple crops all over the world,  
57 which accounts for approximately 30% of the global cultivated area, and provides 20%  
58 of the world's food consumption (Shewry 2009). Wheat is also an important source of  
59 human protein and mineral elements intake (Gill et al. 2004; Appels et al. 2018).  
60 Continuous increased and stable production of wheat holds the promise for ensuring  
61 global food security under the challenge of population booming and limited resource  
62 input in future (Miransari and Smith 2019). Fusarium head blight (FHB), that is also  
63 called scab and caused mainly by *Fusarium graminearum*, is one of the most  
64 destructive diseases of wheat, resulting in huge loss of wheat yield and also imposing  
65 great health threats on both human beings and livestock due to the DON toxin (Bai  
66 and Shaner 1994; Dexter et al. 1996). More seriously, fusarium head blight has  
67 gradually become the major hazard and limitation of wheat production in recent years  
68 because of the climate change and the expansion of conservation agriculture (Zhu et  
69 al. 2019). Thus, revealing the mechanism of FHB resistance and then breeding for  
70 FHB-tolerant wheat varieties is crucial to cope with these problems. Extensive studies  
71 have been carried out to survey resistant germplasm, map and locate the QTLs,  
72 together with clone the major functional genes as well as illuminate the regulation  
73 mechanisms of FHB response in wheat (Buerstmayr et al. 2009; Rawat et al. 2016; Jia  
74 et al. 2018). The great breakthrough is the cloning and functional validation of the  
75 *Fhb1* (syn Qfhs.ndsu-3BS) from cv. Sumai No.3, which is widely used in breeding  
76 practice (Li et al. 2019; Su et al. 2019), as well as the *Fhb7*, which was horizontally  
77 transferred from fungus in wheat (Wang et al. 2020). Additionally, based on RNA-seq  
78 technology, the gene expression profiles and gene co-expression network analysis  
79 have also been systematically performed to identify the FHB-responsive genes and to  
80 discover regulators and genes associated with constitutive resistance (Pan et al. 2018;  
81 Hofstad et al. 2016).

82 RNA editing (DNA/RNA difference) is a conserved post-transcriptional modification  
83 mechanism that base change or modification is occurred when DNA transcribed into  
84 RNA molecule (Keller et al. 1999; Stern et al. 2010). Together with alternative  
85 splicing (AS), RNA editing process provides the indispensable approach for enriching  
86 the genetic information and diversifying the transcriptome, which plays the vital role  
87 in growth and development as well as stress tolerance in many organisms (Wang et al.  
88 2016). Previous studies found that up to 55% of the genetic information in the mature

89 mRNA molecules were inconsistent with the initial DNA sequence (Takenaka et al.  
90 2013; Wakasugi et al. 1996). RNA editing was firstly identified in the mitochondrial  
91 genome of trypanosome in 1986, and now it has been widely reported in many species,  
92 including animals, plants as well as fungi (Bock et al. 1994; Drescher et al. 2002; Liu  
93 et al. 2016). In mammals, the common type of RNA editing is the deamination of  
94 adenosine (A) to inosine (I), which is mainly mediated by the specific ADAR  
95 (adenosine deaminase acting on RNA) family of enzymes (Savva et al. 2012). At the  
96 same time, A to I conversion, independent of ADAR enzyme, is also identified in  
97 fungi. In plants, which is lacking the ADAR gene family, RNA editing was mainly  
98 found in the organelle genome through bioinformatic prediction and molecular  
99 cloning approach, and they were generally regulated by pentapeptide repeat (PPR)  
100 domain protein family (Drescher et al. 2002; Shikanai 2006). With the advances in  
101 high-throughput sequencing, RNA-seq technology provides an efficient, unbiased and  
102 economic way to identify RNA editing on a genome-wide scale. Using this method, a  
103 large number of studies have been conducted to study the RNA editome or landscape  
104 in human and other model species, illuminating the prevalence and importance of  
105 RNA editing (Peng et al. 2012). However, the study of RNA editing in plants is  
106 lagging behind, especially genome-wide identification of DNA/RNA differences in  
107 plant nuclear genome only performed in Arabidopsis up to now (Meng et al. 2010).  
108 The plant-pathogen system provides an ideal model to identify RNA editing targets  
109 associated with pathogen based on RNA-seq method, in that the transcriptome  
110 sequences of the pathogen-treated samples and the counterpart control samples of the  
111 same genotype are generally produced, so as to exclude genotype-specific  
112 polymorphisms and mutations to ensure the accuracy of DNA/RNA difference  
113 identification.

114 Here, we systematically investigated the DNA/RNA differences of wheat in response  
115 to *F. graminearum* using the publicly available RNA-seq samples of four wheat  
116 genotypes (Nyubai, Wuhan 1, HC374, and Shaw), at 2 and 4 days post inoculation  
117 (dpi) with *F. graminearum* infection to understand the roles of DNA/RNA differences  
118 in regulating FHB tolerance in wheat. This study not only identified the DNA/RNA  
119 difference sites associated with FHB resistance to enrich the epigenetic mechanism of  
120 FHB response in wheat, but also pave the way to investigate RNA editome using  
121 RNA-seq in wheat and beyond.

122

123

## 124 **Materials and methods**

### 125 **RNA-seq data and Reads Mapping**

126 The transcriptional dynamics associated with resistance and susceptibility against  
127 FHB of four wheat genotypes were performed by Pan et al (Pan et al. 2018). A total of  
128 48 RNA-seq data of wheat spikes were provided by this study and publically available  
129 from the Sequence Read Archive (SRA) database with the accession no. of  
130 SRP139946. These datasets were downloaded and used in this study, including four  
131 wheat genotypes inoculated with water and *Fusarium graminearum* (strain  
132 DAOM233423) with 3 biological replicates at 2dpi and 4dpi for each genotype,  
133 respectively. Then, the raw RNA-seq reads were filtered for contamination with  
134 adaptor reads, low-quality reads, or unknown nucleotides using FastQC (version  
135 0.11.8) and Trimmomatic (version 0.39). The cleaned RNA-seq reads were mapped  
136 against the reference genome (IWGSC RefSeq version 1.1) (Appels et al. 2018) using  
137 2-pass mode of STAR (version 2.7.5c) (Dobin et al. 2012). The alignments were used  
138 for transcript assembly with StringTie (version 1.3.5). Furthermore, we quantified the  
139 read coverage of each gene by HTSeq (version 0.11.2) (*htseq-count -f bam -m union*  
140 *{f}\_sorted.bam \$ref > {f}count.txt*). Differentially expressed genes were identified  
141 using DESeq2 tool with the adjusted P value was less than 0.05 and  $|\log_2\text{FoldChange}| >$   
142 0 (Love et al. 2014).

143

### 144 **DNA/RNA difference sites identification**

145 Firstly, using the MarkDuplicates tool of Picard (<http://picard.sourceforge.net/>)  
146 marked the repeated sequence in the bam files obtained by STAR (2-pass mode).  
147 Then, the reads on the exon were separated by using the SplitNCigarReads tool in  
148 GATK, and the N error base was removed and the read in the intron region was  
149 removed. HaplotypeCaller tool in GATK (Genome Analysis Toolkit) software was  
150 used to call SNPs with the parameter as follow: *--genotype\_likelihoods\_model 'SNP'*,  
151 *--stand\_call\_conf '30'*, *--stand\_emit\_conf '30'* (Ramaswami et al. 2013). Then, the  
152 SNP was obtained as the raw gVCF file of each sample, and further used for  
153 subsequent analysis. To obtaining high confidence sites, we filtered raw VCF files  
154 step by step as follow: (1) Systematic error of the sequencing platform and software  
155 were corrected by GATK VariantFiltration tool, and we select the initial filter  
156 parameter *-filter "FS > 30.0"*, *-filter "QD < 2.0"*; (2) To improve the accuracy, the

157 three biological replicates were intersected to obtain DNA/RNA differences that  
158 appeared in three replicates simultaneously and the each sequence information was  
159 verified by Integrative Genomics Viewer (IGV); (3) To avoid genotype-specific  
160 genomic SNP polymorphisms, we compared the DNA/RNA differences between  
161 *Fg*-treated samples and their counterpart control samples of the same genotype, and  
162 the same DNA/RNA differences between them were removed.  
163 Finally, the 654,653 SNP variations of 1,002 wheat genotypes include 717 genotyped  
164 by DARTseq platform and 285 genotyped by Wheat 660K SNP array (Zhou et al.  
165 2018) were used to map the qualified DNA/RNA differences obtained from above  
166 analysis to filter out the putative SNP sites with the same genomic physical position.  
167 Through these programs, the accuracy and high-reliability DNA/RNA differences  
168 were finally obtained. They were annotated with SnpEff tool (version 3.6) with the  
169 annotation file downloaded from Ensemble Plants database  
170 (<http://plants.ensem-bl.org/index.html>). The orthologous genes of candidates in  
171 *Arabidopsis* or rice were also obtained from Ensemble database.

172

### 173 **Co-expression network analysis**

174 Gene co-expression network analysis was conducted based on the all genes using the  
175 R package WGCNA tool (Langfelder and Horvath 2008). Genes with an average TPM  
176 value greater than 2 and at least one sample expressed were used. A Pearson  
177 correlation coefficient matrix was computed. Then, we calculate  $\log_{10}[p(k)]$  and  
178  $\log_{10}(k)$  separately, and fit the calculated results to determine 6 is easier to meet the  
179 criterion of negative correlation between  $\log_{10}[p(k)]$  and  $\log_{10}(k)$ . After determining  
180 the beta value, we converted the relationship matrix into an adjacency matrix and  
181 TOM similarity matrix was generated for each adjacency matrix. The different  
182 coefficients and hierarchical clustering trees of different nodes are calculated and  
183 constructed; hierarchical clustering was employed based on the similarity matrix to  
184 cluster genes. To obtain the correct module number and clarify gene interaction, we  
185 set the restricted minimum gene number to 30 for each module and used a threshold  
186 of 0.25 to merge the similar modules. Genes that have higher weight in important  
187 modules were chosen to constructed co-expression network. The traits data publicly  
188 available, including *Fg* treatment, *Fg* time, *Fg* percent, *Fg* GAPDH  
189 (Glyceraldehyde-3-phosphate dehydrogenase) and DON (Deoxynivalenol) were used  
190 for trait-module correlation analysis. GO and KEGG enrichment analysis was

191 conducted using KOBAS 3.0 software (Xie et al. 2011) with the annotation file of  
192 *Arabidopsis thaliana* as background.

193

#### 194 **RNA structure analysis**

195 RNAfold in the Vienna RNA Secondary Structure Package (Gruber et al. 2008) were  
196 used to predict the secondary structure of candidate RNA editing genes before and  
197 after editing. In order to compare the RNA structure of different genes reasonably, we  
198 calculated the normalized free energy of RNA secondary structure by the method of  
199 predecessors (Mao et al. 2013). Each candidate sequence was randomly shuffled 100  
200 times to control base composition before and after editing. Then, normalized  
201 minimum folding free energy (MFE) of each candidate was calculated using RNAfold  
202 by

$$z\text{-score} = \frac{mfe_{native} - mfe_{random}}{\sigma}$$

203 Among equation,  $mfe_{native}$ ,  $mfe_{random}$ , and  $\sigma$  is the free energy of native sequence,  
204 mean MFE of 100 random sequences and standard deviation of the MFE of 100  
205 random sequences, respectively.

206

#### 207 **miRNA target analysis**

208 To determine whether DNA/RNA differences affected miRNA targeting sites, all of  
209 candidate editing genes transcripts were searched against the published wheat miRNAs  
210 in the miRBase using psRNATarget tools (Dai and Zhao 2011) to predict whether they  
211 targeted by miRNAs. The possibility of miRNA targeted on edited genes was scored  
212 using Schema V2 (2017 release) schema, and selected the result with the minimum  
213 expected value as the optimal prediction.

214

#### 215 **Protein domain and structure analysis**

216 The PFAM database (33.0 release) were used to predicted protein domain by  
217 HMMER v3.3.1 tools (Finn et al. 2011) with E-value  $< 1 \times 10^{-5}$ . Protein 3D Structure  
218 was predicted using homology modeling methods in SWISS-MODEL database  
219 (<https://swissmodel.expasy.org/>). We selected the best result that the model has the  
220 highest agreement with the target protein and is greater than 30%.

221

#### 222 **Orthologous gene analysis**



223 In order to better clarify the potential function of the RNA editing genes, the  
224 functionally validated genes in Arabidopsis and rice were downloaded from the TAIR  
225 (<https://www.arabidopsis.org/>) and Ricedata (<https://www.ricedata.cn/gene/>) databases  
226 respectively. Then, we used validated genes as the query to search against the local  
227 wheat proteins by BLASTP tool (Camacho et al., 2009) with the identity more than 40%  
228 and E-value of 1e-10 as threshold.

229

## 230 **Results and Discussion**

### 231 **Identification of DNA/RNA difference using RNA-seq data**

232 Based on the RNA-seq data, a total of 137,037 transcripts and 110,777 gene loci were  
233 constructed for the four wheat genotypes, which covered more than 99% of the  
234 reference genome of wheat IWGSC V1.1 (Fig. 1a). Then, the difference of sequence  
235 between RNA and DNA were identified using the method described above, and  
236 16,399 putative DNA/RNA difference sites associated with FHB were obtained,  
237 suggesting massive difference events were occurred in wheat responding to FHB. In  
238 detail, a total of 292 difference sites in wheat genotype HC374, 444 in Nyubai and  
239 3,490 in Wuhan 1 as well as 3,836 in Shaw were found at 2 dpi, while at 4dpi 568,  
240 490, 3,847 and 3,432 sites were identified in HC374, Nyubai, Wuhan 1 and Shaw,  
241 respectively (Fig. 1b) (Table S1). Compared to 2dpi, the DNA/RNA difference sites at  
242 4dpi always showed more abundant in all of three resistant genotypes, indicating that  
243 the number of difference site increased with the extension of *Fg* injection in resistant  
244 genotypes while no found in susceptible genotype Shaw. Furthermore, 14,452 unique  
245 DNA/RNA difference sites presenting in 8,346 genes were obtained through  
246 removing the redundant sites, of which 5,361 genes have one sites, follow by 1,801,  
247 633 and 244 genes with 2, 3 and 4 sites, as well as 307 genes with more than 5 sites.  
248 Further studies to decipher the molecular basis underling DNA/RNA difference could  
249 provide vital clues for the complex of transcription regulation as well as genetic  
250 variations. The physical position of these difference sites mainly located about 10kb  
251 upstream or downstream of the TSS of the corresponding correlation genes (Fig. 1c),  
252 suggesting that difference events may have a large influence on these genes'  
253 expression. Finally, we further annotated these DNA/RNA difference sites. Results  
254 showed that 9,306, 206, 900 and 1,926 sites were located in CDS, intron, 3'UTR and  
255 5'UTR, respectively. A total of 6,586 and 2,720 DNA/RNA difference sites emerged  
256 as missense variant and synonymous variants, accounting for 45.57% and 18.82%

257 respectively, suggesting that missense variants would lead to one amino acid change  
258 in the protein composition (Table S1). At the same time, there also 426 sites could  
259 cause the amino acid substitution, particularly, 388 stop-gained variations were  
260 identified. Although the DNA/RNA difference associated with FHB has been  
261 identified, the false positive results still appeared because of the coverage of reads and  
262 the existence of SNP. Therefore, further validation analysis was needed to obtain  
263 reliable RNA editing sites related to FHB from DNA/RNA differences.

264

### 265 **Identification of putative DNA/RNA differences associated with FHB tolerance**

266 Based on all DNA/RNA differences results, we conducted a comprehensive screening  
267 of FHB-related RNA editing sites using the IGV tools, and we focused on the  
268 common RNA editing sites of four varieties and three resistant varieties to eliminate  
269 false positives caused by genotype differences (see **Materials and methods** for more  
270 details). In detail, a total of 206 RNA editing sites were identified in two stages and  
271 four wheat genotypes, of which contained 187 unique RNA editing sites in 36 genes  
272 (Fig. 1d and Table S2). Among them, 159 sites were common in four wheat genotypes  
273 and 47 were common in three resistant genotypes. Compared to 2dpi, the editing sites  
274 at 4dpi always showed more abundant, indicating that the number of RNA editing  
275 sites increased with the extension of *Fg* injection in each genotype. Moreover, 13  
276 common RNA editing events of TraesCS2D02G179300, TraesCS2D02G405500,  
277 TraesCS3A02G263900, TraesCS4A02G107600 and TraesCS5A02G073800 were  
278 found in 2dpi and 4dpi in four wheat genotypes, and 4 common RNA editing sites of  
279 TraesCS5A02G073800 were identified in 2dpi and 4dpi in three resistant genotypes  
280 (Table S2). These loci may play an important role in different stages of FHB response.  
281 From the perspective of editing type (Fig. 1e), 95 editing sites (50.79%) were the type  
282 of transition, of which the conversion between C and T accounted for 24.06%, and A  
283 and G accounted for 26.74%, respectively, representing the two most abundant editing  
284 types. These two types were also the two canonical RNA editing (Pachter 2012).  
285 Among transversions, G to T (10.70%) and C to A (9.63%) were the most abundant,  
286 following by C to G, G to C, T to G and A to C with all of the value of about 23.53%,  
287 while T to A and A to T types are the lowest ones with the value of 2.67%,  
288 respectively. It is obvious that base transition events were significantly lower than  
289 transversion in these editing sites (Transition/Transversion ratio was 1.033) although  
290 there are twice as many possible transversions on the fact of frequency. It is well

291 known to us that transitions are enriched over transversions at genome level as  
292 transversions generally result in the amino acid substitution and are more likely to be  
293 depleted due to evolutionary selection (Guo et al 2017). Then, we further annotated  
294 these RNA editing sites. Results showed that 162 and 25 sites were located in protein  
295 coding region and non coding region, respectively. A total of 45 and 117 editing sites  
296 emerged as missense variant and synonymous variants, accounting for 24.06% and  
297 62.57%, respectively (Fig. 1f), of which the editing sites could cause the amino acid  
298 substitution might have important regulation roles in response to *Fg* infection in  
299 wheat. Editing efficiency was reflected by the ratio of edited reads to total reads of  
300 each edited sites. The RNA editing efficiency of each variety was significantly  
301 different between control group and treatment group, of which the editing efficiency  
302 of Shaw was the highest (Fig. 2a). The density of efficiency of three resistant varieties  
303 showed left skewed distribution and Shaw showed right skewed distribution (Fig. 2b).  
304 The difference of editing efficiency between different varieties may indicate the  
305 difference of FHB tolerance.

306

### 307 **Integration of RNA editing sites and gene expression**

308 To further confirm the FHB-responsive RNA editing sites, we investigated the  
309 expression patterns of these edited genes (Fig. 3) (Table S3). Among them,  
310 TraesCS1A02G258800 and TraesCS1D02G258800 was differential expressed in each  
311 stage of four varieties. Meanwhile, four differential expressed edited genes (DEEGs)  
312 were shared by all of the four varieties in 4dpi. Compared with sensitive variety Shaw,  
313 TraesCS3D02G328300 showed differential expression in 2dpi of three resistant  
314 varieties, indicating the potential function of this gene in response to FHB. On the  
315 contrary, six and three genes of Shaw were down regulated and up-regulated  
316 respectively, and there was no difference in the expression of these genes in resistant  
317 varieties after inoculation. Furthermore, TraesCS4D02G319400 is annotated to  
318 encode a glycosyldehyde-3-phosphate dehydrogenase (GAPDH). It has been  
319 demonstrated that GAPDH involved in the protein aggregation and DNA repair due to  
320 stress-related factors (Zaffagnini et al. 2019), indicating that RNA editing in GAPDH  
321 might mediate glycolysis pathway to promote the FHB tolerance. Otherwise, the  
322 differential expression of TraesCS3A02G263900 was found in 4dpi of Shaw,  
323 indicating the potential function associated with *Fg* infection. Meanwhile, *OsRACK1*  
324 was the orthologues of TraesCS3A02G263900 and it has been proved to have the

325 function of resistance to rice blast (Nakashima et al. 2008).  
326 To preliminarily understand the function and regulatory network of these RNA editing  
327 genes, we further constructed the WGCNA co-expression network based the 58,280  
328 expressed genes and then linked the co-expression modules with the available  
329 phenotypic data of the *Fg* infection, including percentage (*Fg* infection), DON  
330 (Deoxynivalenol), GAPDH (Glyceraldehyde-3-phosphate dehydrogenase RNA level)  
331 and infection time, which were referred from previous study (Pan et al. 2018). Totally,  
332 34 co-expression gene modules were obtained by constructing a scale-free network  
333 and dynamic tree cutting (Hierarchical Cluster) and modules were renamed M1-M34  
334 according to the number of module genes, of which M1 module contained 12,301  
335 genes, ranking the largest module, followed by M2 with the 7,217 genes, while M34  
336 modules had only 39 genes (Fig. S2). Furthermore, Pearson correlation coefficient  
337 matrix was calculated between the modules and phenotypes (Fig. S3 and Table S4).  
338 Results showed that the M2 and M11 had high positive correlations with all the 5  
339 phenotypes about *Fg* infection, which might be the key module associated with *Fg*  
340 infection. And M12 and M33 had positive correlations with four phenotypes  
341 (percentage, DON, GAPDH, infection time). M5, M16, M29 and M32 had positive  
342 correlations with *Fg* infection and infection time.  
343 Then, we identified the co-expression module of each editing gene (Table S4). M1  
344 module contained most of the editing genes, following with M4. The co-expression  
345 modules containing editing genes were associated with at least one FHB responsive  
346 trait. It is worth noting that five co-expression modules (M1, M2, M5, M7, M11) of  
347 the candidate genes were positively or negatively correlated with *Fg* infection,  
348 indicating that these genes play a more important role in wheat scab response. GO  
349 enrichment analysis of the edited genes found that most genes (77.78%, 28) were  
350 enriched in the term of cytosol (GO:0005829, 4.36E-23), and 5 genes enriched in  
351 defense response to fungus (GO:0050832, 2.20E-06) (Table S5). At the same time, the  
352 candidate genes were also enriched into the terms related to structure of protein or  
353 RNA, such as mRNA binding (GO:0003729, 2.82E-21), cellular response to unfolded  
354 protein (GO:0034620, 2.69E-11), misfolded protein binding (GO:0051787, 5.41E-10),  
355 cell wall (GO:0005618, 1.59E-06) (Table S5). For KEGG pathway enrichment, 3  
356 genes (TraesCS4B02G178200, TraesCS3D02G328300, TraesCS4A02G126700) were  
357 found to enriched in MAPK signaling pathway-plant (ath04016, 4.25E-04), which is a  
358 crucial pathway related to abiotic and biotic stress (Zhang and Klessig 2001; Meng

359 and Zhang 2013; Pitzschke et al. 2009). In addition, these 3 genes were also  
360 significantly enriched in plant-pathogen interaction (ath04626, 8.37E-04). These  
361 results suggested RNA editing was widely occurred in the genes associated with *Fg*  
362 infection, responding and tolerance in wheat. Further functional study of these RNA  
363 editing sites will not only mine some vital resistance gene for genetic improvement,  
364 and also contribute to enrich the epigenetic mechanism of FHB response in wheat.

365

### 366 **The effect of RNA editing on RNA structure**

367 RNA structure is crucial to its function that RNA mainly depends on its local structure  
368 to interact with other proteins or molecules (Wan et al. 2011; Dethoff et al. 2012). The  
369 secondary structure of mRNA is mainly involved in cell processes through two forms:  
370 specific secondary structure binding to other molecules and conserved structural  
371 protective functional elements (Keller et al. 2012). RNA editing events directly affect  
372 the secondary structure of RNA (Solomon et al. 2017). Therefore, the RNA editing  
373 events in response to FHB may lead to changes in RNA structure and affect its  
374 function. Thus, RNA secondary structures of these FHB-responsive edited genes were  
375 predicted by the minimum free energy model. Results showed that 162 candidate sites  
376 in 32 editing genes could result in the change of RNA secondary structure (Table S6).  
377 After editing, the average MFE value were basically the same as that of before editing,  
378 but the average normalized MFE values had differences. Among these sites, the  
379 minimum free energy of 75 sites increased after editing, while that of the other 87  
380 sites decreased. The normalized MFE of chr6B\_55695035 site in  
381 TraesCS6B02G079200 increased by 40%, ranking the highest change. Meanwhile,  
382 TraesCS6D02G401900 had the minimum normalized MFE after chr6D\_470684693  
383 site editing. In the minimum free energy model, organisms will fold RNA into a  
384 secondary structure with minimum free energy, thus saving energy (DAWSON and  
385 YAMAMOTO 1999; Mathews et al. 1999). Therefore, MFE can be used to measure  
386 the stability of structures that the structure with low MFE value showed more stable.  
387 According to our prediction, 75 candidate RNA editing sites could lead to the  
388 instability of RNA, and then impair their normal function. On the contrary, the other  
389 87 editing sites could lead the decrease of MFE value of the responding RNA  
390 secondary structure, indicating these editing sites played the crucial roles in  
391 maintaining or increasing the stability of their structure to perform their functions.  
392 These results suggested that RNA editing could impact on the function of the target

393 genes through regulating their secondary structures. Further study the specific roles of  
394 RNA editing playing in regulating RNA secondary structure when in response to *Fg*  
395 infection might contribute to the genetic basis underling FHB tolerance.

396

### 397 **The effect of RNA editing on binding ability and protein structure**

398 It has been demonstrated that RNA editing as the conserved post-transcriptional  
399 modification mechanism, could impact on binding ability, protein composition and  
400 protein structure (Takenaka et al. 2013). microRNAs (miRNAs) are one class of  
401 non-coding RNA to regulate gene expression through mediating targeted mRNAs  
402 cleavage or translational inhibition (Meng et al. 2010). RNA editing generally caused  
403 the mRNA sequence variations, which could impact on miRNA-mRNA binding (Mao  
404 et al. 2018). To better understand the function of RNA editing under *Fg* infection, we  
405 further investigated its effect on miRNA targeting. We identified seven RNA editing  
406 sites (1: chr3A\_487854715; 2: chr3A\_487854745; 3: chr3A\_487854754; 4:  
407 chr3A\_487854757; 5: chr3A\_487854758; 6: chr3A\_487854760; 7: chr3A\_487854763)  
408 occurring in TraesCS3A02G263900 (Fig. 4a and Fig. S4), of which six sites were  
409 common to four varieties at 4dpi and site 2 were shared by four varieties at 2dpi and  
410 4dpi (Table S2). Meanwhile, site 1 changed the amino acid from Glu to Asp and site 4  
411 and 5 changed the common amino acid from Ala to Gly. Through analyzing the  
412 binding ability of gene after editing, we found that the occurrence of site 1 editing  
413 made the gene having the binding site of *tae-miR9664-3p* (Fig. 4a and Table S7) and  
414 the RNA secondary structure of gene was also changed by this RNA editing sites, of  
415 which the MFE of structure changed from -389.70 to -385.70 kcal/mol (Fig. 4b and  
416 Fig. 4c), indicating the stability of RNA structure was decreased. Interestingly, the  
417 editing efficiency of site 1 was significantly differential after editing in four varieties  
418 and the efficiency in Shaw was the highest (Fig. 4d). At the same time, the expression  
419 level of TraesCS3A02G263900 was down-regulated in HC374, Nyubai and Shaw, of  
420 which the expression level was significantly differential in Shaw after editing (Fig.  
421 4e). These results suggest that the change of editing gene expression level may be  
422 caused by the change of miRNA binding ability caused by editing site. In general, the  
423 stronger the binding ability of miRNA, the weaker the gene expression. Meanwhile,  
424 there may be other regulatory mechanisms for the change of the expression level of  
425 this gene in Wuhan 1. Furthermore, the analysis of orthologues and conserved domain  
426 showed TraesCS3A02G263900 have a WD 40 domain and was also a orthologues

427 gene of *OsRACK1* (Table S2 and S8). Component of the *OsRACK1* regulatory  
428 proteins that functions in innate immunity by interacting with multiple proteins in the  
429 RAC1 immune complex. *OsRACK1* also acts as positive regulator of reactive oxygen  
430 species (ROS) production and is required for resistance against rice blast (*M.grisea*)  
431 infection , indicating the potential function of TraesCS3A02G263900 in response to  
432 FHB.

433 Tubulin is closely related to intracellular material transport, cell differentiation, cell  
434 movement, signal recognition, cell division and development. At the same time, plant  
435 tubulin is also related to the synthesis of cellulose microfibrils and plays a role in the  
436 growth and development of plant secondary wall (Yoshikawa et al. 2003). Here,  
437 TraesCS1D02G258800, belonging to Tubulin/FtsZ family and containing GTPase  
438 conserved domain (Table S8), were found to have nine RNA editing sites (1:  
439 chr1D\_351247689; 2: chr1D\_351247692; 3: chr1D\_351247703; 4:  
440 chr1D\_351247708; 5: chr1D\_351247769; 6: chr1D\_351247770; 7: chr1D\_351247778;  
441 8: chr1D\_351247793; 9: chr1D\_351247799) (Fig. 5a and Fig. S5). Among these sites,  
442 site 1, 2, 3, 4 and 6 changed the amino acid from Ser to Ala, Ile to Val, Met to Ile, Arg  
443 to Lys and Gly to Ser, respectively (Table S2). Furthermore, the RNA secondary and  
444 protein 3D structure prediction showed differences after editing. Due editing, the  
445 MFE of RNA secondary structure changed from -515.30 to -507.10 kcal/mol,  
446 indicating the stability of RNA structure decreased (Fig. 5b and Fig. 5c). The torsion  
447 of protein 3D structure changed from -1.81 to -2.20 (Fig. 5d and Fig. 5e).

448

## 449 **Conclusion**

450 This is the first study to identify DNA/RNA differences associated with *Fg* infection  
451 in wheat at the whole transcriptome level. Totally, 187 unique DNA/RNA difference  
452 events (RNA editing sites) in 36 genes were identified in four varieties. The canonical  
453 G to A and C to T editing sites were found to be the most abundant, as well as other  
454 editing types were also identified. Integration of the RNA editing and gene expression,  
455 the differential expressed edited genes were also obtained, which could be considered  
456 as the potential resource for discovering the key novel genes associated *Fg* infection  
457 and tolerance. Finally, the effects of RNA editing were investigated and found that it  
458 could change the RNA secondary structure, protein 3D structure as well as miRNA  
459 targeting sites of edited genes to participate in the regulatory network of FHB  
460 response and tolerance. This study lay the foundation for further functional studies to

461 reveal the roles of RNA editing playing in FHB response and tolerance in wheat,  
462 which will enrich the molecular basis underlying FHB tolerance, and also facilitate  
463 FHB tolerance improvement through epigenetic method in wheat and beyond.

464

#### 465 **Acknowledgement**

466 We are grateful to Dr. Pan Youlian and his collaborators for sharing the RNA-seq data,  
467 which is publicly available from NCBI SRA database (SRP139946). We also  
468 appreciate the High-Performance Computing center of Northwest A&F University for  
469 providing computational resources.

470

#### 471 **Funding**

472 This work was mainly funded by the National Natural Science Foundation of China  
473 (Grant No. 31771778 and 31971885), and partially supported by the Key Research  
474 and Development Program of Shaanxi Province, China (Grant No. 2019NY-014).

475

#### 476 **Conflict of Interests**

477 Authors declare that there are no conflicts of interest.

478

#### 479 **Data availability**

480 The data that supports the findings of this study are available in the supplementary  
481 material of this article.

482



483 **References**

- 484 Appels R, Eversole K, Stein N, Feuillet C, Keller B, Rogers J, Pozniak CJ, Choulet F,  
485 Distelfeld A, Poland JJS (2018) Shifting the limits in wheat research and  
486 breeding using a fully annotated reference genome. *Science* 361 (6403).  
487 doi:10.1126/science.aar7191
- 488 Bai G, Shaner GJPd (1994) Scab of wheat: prospects for control. *Plant Dis* 78  
489 (8):760-766. doi:10.1094/PD-78-0760
- 490 Bock R, Kössel H, Maliga PJTEj (1994) Introduction of a heterologous editing site  
491 into the tobacco plastid genome: the lack of RNA editing leads to a mutant  
492 phenotype. *Embo Journal* 13 (19):4623-4628. doi:10.1021/bi00066a040
- 493 Buerstmayr H, Ban T, Anderson JAJp (2009) QTL mapping and marker-assisted  
494 selection for Fusarium head blight resistance in wheat: a review. *Plant*  
495 *Breeding* 128 (1):1-26. doi:10.1111/j.1439-0523.2008.01550.x
- 496 Camacho C, Coulouris G, Avagyan V, Ma N, Papadopoulos J, Bealer K, Madden  
497 708 TL (2009) BLAST+: architecture and applications. *BMC Bioinformatics*  
498 10: 421. doi: 10.1186/1471-2105-10-421
- 499 Dai X, Zhao PX (2011) psRNATarget: a plant small RNA target analysis server.  
500 *Nucleic Acids Res* 39 (Web Server issue):W155-159. doi:10.1093/nar/gkr319
- 501 DAWSON WK, YAMAMOTO KJJotb (1999) Mean free energy topology for  
502 nucleotide sequences of varying composition based on secondary structure  
503 calculations. *J Theor Biol* 201 (2):113-140. doi: 10.1006/jtbi.1999.1018
- 504 Dethoff EA, Chugh J, Mustoe AM, Al-Hashimi HM (2012) Functional complexity  
505 and regulation through RNA dynamics. *Nature* 482 (7385):322-330.  
506 doi:10.1038/nature10885
- 507 Dexter J, Clear R, Preston KJCC (1996) Fusarium head blight: effect on the milling  
508 and baking of some Canadian wheats. *Cereal Chemistry* 73 (6):695-701.  
509 doi:10.1021/bp960078c
- 510 Dobin A, Davis CA, Schlesinger F, Drenkow J, Gingeras TR (2012) Star: ultrafast  
511 universal rna-seq aligner. *Bioinformatics* 29 (1).  
512 doi:10.1093/bioinformatics/bts635

- 513 Drescher A, Hupfer H, Nickel C, Albertazzi F, Hohmann U, Herrmann RG, Maier RM  
514 (2002) C-to-U conversion in the intergenic ndhI/ ndhG RNA of plastids  
515 from monocot plants: conventional editing in an unconventional small reading  
516 frame? *Mol Genet Genomics* 267 (2):262-269.  
517 doi:10.1007/s00438-002-0662-9
- 518 Finn RD, Clements J, Eddy SR (2011) HMMER web server: interactive sequence  
519 similarity searching. *Nucleic Acids Res* 39 (Web Server issue):W29-37.  
520 doi:10.1093/nar/gkr367
- 521 Guo C, McDowell IC, Nodzinski M, Scholtens DM, Allen AS, Lowe WL, Reddy TE  
522 (2017) Transversions have larger regulatory effects than transitions. *BMC*  
523 *Genomics* 18 (1):394. doi:10.1186/s12864-017-3785-4
- 524 Gill BS, Appels R, Botha-Oberholster A-M, Buell CR, Bennetzen JL, Chalhoub B,  
525 Chumley F, Dvořák J, Iwanaga M, Keller BJG (2004) A workshop report on  
526 wheat genome sequencing: International Genome Research on Wheat  
527 Consortium. *Genetics* 168 (2):1087-1096. doi:10.1534/genetics.104.034769
- 528 Gruber AR, Lorenz R, Bernhart SH, Neubock R, Hofacker IL (2008) The Vienna  
529 RNA websuite. *Nucleic Acids Res* 36 (Web Server issue):W70-74.  
530 doi:10.1093/nar/gkn188
- 531 Hofstad AN, Nussbaumer T, Akhunov E, Shin S, Kugler KG, Kistler HC, Mayer KF,  
532 Muehlbauer GJ (2016) Examining the Transcriptional Response in Wheat  
533 Near-Isogenic Lines to Infection and Deoxynivalenol Treatment. *Plant*  
534 *Genome* 9 (1). doi:10.3835/plantgenome2015.05.0032
- 535 Jia H, Zhou J, Xue S, Li G, Yan H, Ran C, Zhang Y, Shi J, Jia L, Wang XJTCJ (2018)  
536 A journey to understand wheat Fusarium head blight resistance in the Chinese  
537 wheat landrace Wangshuibai. *The Crop Journal* 6 (1):48-59.  
538 doi:10.1016/j.cj.2017.09.006
- 539 Keller TE, Mis SD, Jia KE, Wilke CO (2012) Reduced mRNA secondary-structure  
540 stability near the start codon indicates functional genes in prokaryotes.  
541 *Genome Biol Evol* 4 (2):80-88. doi:10.1093/gbe/evr129
- 542 Keller W, Wolf J, Gerber AJFl (1999) Editing of messenger RNA precursors and of

- 543 tRNAs by adenosine to inosine conversion. *FEBS Letters* 452 (1-2):71-76.  
544 doi:10.1016/s0014-5793(99)00590-6
- 545 Langfelder P, Horvath S (2008) WGCNA: an R package for weighted correlation  
546 network analysis. *BMC Bioinformatics* 9:559. doi:10.1186/1471-2105-9-559
- 547 Li G, Zhou J, Jia H, Gao Z, Fan M, Luo Y, Zhao P, Xue S, Li N, Yuan Y, Ma S, Kong  
548 Z, Jia L, An X, Jiang G, Liu W, Cao W, Zhang R, Fan J, Xu X, Liu Y, Kong Q,  
549 Zheng S, Wang Y, Qin B, Cao S, Ding Y, Shi J, Yan H, Wang X, Ran C, Ma Z  
550 (2019) Mutation of a histidine-rich calcium-binding-protein gene in wheat  
551 confers resistance to *Fusarium* head blight. *Nature Genetics* 51 (7):1106-1112.  
552 doi:10.1038/s41588-019-0426-7
- 553 Liu H, Wang Q, He Y, Chen L, Hao C, Jiang C, Li Y, Dai Y, Kang Z, Xu JR (2016)  
554 Genome-wide A-to-I RNA editing in fungi independent of ADAR enzymes.  
555 *Genome Res* 26 (4):499-509. doi:10.1101/gr.199877.115
- 556 Love MI, Huber W, Anders S (2014) Moderated estimation of fold change and  
557 dispersion for RNA-seq data with DESeq2. *Genome Biol* 15 (12):550.  
558 doi:10.1186/s13059-014-0550-8
- 559 Yoshikawa M, Yang GX, Kawaguchi K, Komatsu S (2003). Expression analyses of  
560  $\beta$ -tubulin isotype genes in rice. *Plant & Cell Physiology* 44 (11):1202-7.  
561 doi:10.1093/pcp/pcg150
- 562 Mao L, Ling H-Q, Wan J (2018) Wheat functional genomics research in China: a  
563 decade of development. *The Crop Journal* 6 (1):1-6.  
564 doi:10.1016/j.cj.2018.01.001
- 565 Mao Y, Li Q, Wang W, Liang P, Tao S (2013) Number variation of high stability  
566 regions is correlated with gene functions. *Genome Biol Evol* 5 (3):484-493.  
567 doi:10.1093/gbe/evt020
- 568 Mathews DH, Sabina J, Zuker M, Turner DH (1999) Expanded sequence  
569 dependence of thermodynamic parameters improves prediction of RNA  
570 secondary structure. *J. Mol. Biol.* 288 (5):911-940. doi:  
571 10.1111/j.1469-0691.2006.01478.x
- 572 Meng X, Zhang S (2013) MAPK cascades in plant disease resistance signaling. *Annu*

- 573 Rev Phytopathol 51:245-266. doi:10.1146/annurev-phyto-082712-102314
- 574 Meng Y, Chen D, Jin Y, Mao C, Wu P, Chen M (2010) RNA editing of nuclear  
575 transcripts in *Arabidopsis thaliana*. BMC Genomics 11 Suppl 4:S12.  
576 doi:10.1186/1471-2164-11-S4-S12
- 577 Miransari M, Smith DJCrib (2019) Sustainable wheat (*Triticum aestivum* L.)  
578 production in saline fields: a review. Crit Rev Biotechnol 39 (8):999-1014.  
579 doi:10.1080/07388551.2019.1654973
- 580 Nakashima A, Chen L, Thao NP, Fujiwara M, Wong HL, Kuwano M, Umemura K,  
581 Shirasu K, Kawasaki T, Shimamoto K (2008) Rack1 functions in rice innate  
582 immunity by interacting with the rac1 immune complex. The Plant Cell 20 (8):  
583 2265-2279. doi:10.1105/tpc.107.054395
- 584 Pachter L (2012) A closer look at RNA editing. Nat Biotechnol 30 (3):246-247.  
585 doi:10.1038/nbt.2156
- 586 Pan Y, Liu Z, Rocheleau H, Fauteux F, Wang Y, McCartney C, Ouellet T (2018)  
587 Transcriptome dynamics associated with resistance and susceptibility against  
588 fusarium head blight in four wheat genotypes. BMC Genomics 19 (1):642.  
589 doi:10.1186/s12864-018-5012-3
- 590 Peng Z, Cheng Y, Tan BC, Kang L, Tian Z, Zhu Y, Zhang W, Liang Y, Hu X, Tan X,  
591 Guo J, Dong Z, Liang Y, Bao L, Wang J (2012) Comprehensive analysis of  
592 RNA-Seq data reveals extensive RNA editing in a human transcriptome. Nat  
593 Biotechnol 30 (3):253-260. doi:10.1038/nbt.2122
- 594 Pitzschke A, Schikora A, Hirt HJCoipb (2009) MAPK cascade signalling networks in  
595 plant defence. Curr Opin Plant Biol 12 (4):421-426. doi:  
596 10.1016/j.pbi.2009.06.008
- 597 Ramaswami G, Zhang R, Piskol R, Keegan LP, Deng P, O'Connell MA, Li JB (2013)  
598 Identifying RNA editing sites using RNA sequencing data alone. Nat Methods  
599 10 (2):128-132. doi:10.1038/nmeth.2330
- 600 Rawat N, Pumphrey MO, Liu S, Zhang X, Tiwari VK, Ando K, Trick HN, Bockus  
601 WW, Akhunov E, Anderson JA, Gill BS (2016) Wheat Fhb1 encodes a  
602 chimeric lectin with agglutinin domains and a pore-forming toxin-like domain

- 603 conferring resistance to Fusarium head blight. *Nat Genet* 48 (12):1576-1580.  
604 doi:10.1038/ng.3706
- 605 Savva YA, Rieder LE, Reenan RAJGb (2012) The ADAR protein family. *Genome*  
606 *Biology* 13 (12):1-10. doi:10.1186/gb-2012-13-12-252
- 607 Shewry PR (2009) Wheat. *J Exp Bot* 60 (6):1537-1553. doi:10.1093/jxb/erp058
- 608 Shikanai T (2006) RNA editing in plant organelles: machinery, physiological function  
609 and evolution. *Cell Mol Life Sci* 63 (6):698-708.  
610 doi:10.1007/s00018-005-5449-9
- 611 Solomon O, Di Segni A, Cesarkas K, Porath HT, Marcu-Malina V, Mizrahi O,  
612 Stern-Ginossar N, Kol N, Farage-Barhom S, Glick-Saar E, Lerenthal Y,  
613 Levanon EY, Amariglio N, Unger R, Goldstein I, Eyal E, Rechavi G (2017)  
614 RNA editing by ADAR1 leads to context-dependent transcriptome-wide  
615 changes in RNA secondary structure. *Nat Commun* 8 (1):1440.  
616 doi:10.1038/s41467-017-01458-8
- 617 Stern DB, Goldschmidt-Clermont M, Hanson MR (2010) Chloroplast RNA  
618 metabolism. *Annu Rev Plant Biol* 61:125-155.  
619 doi:10.1146/annurev-arplant-042809-112242
- 620 Su Z, Bernardo A, Tian B, Chen H, Wang S, Ma H, Cai S, Liu D, Zhang D, Li T, Trick  
621 H, St. Amand P, Yu J, Zhang Z, Bai G (2019) A deletion mutation in TaHRC  
622 confers Fhb1 resistance to Fusarium head blight in wheat. *Nature Genetics* 51  
623 (7):1099-1105. doi:10.1038/s41588-019-0425-8
- 624 Takenaka M, Zehrmann A, Verbitskiy D, Hartel B, Brennicke A (2013) RNA editing  
625 in plants and its evolution. *Annu Rev Genet* 47:335-352.  
626 doi:10.1146/annurev-genet-111212-133519
- 627 Wakasugi T, Hirose T, Horihata M, Tsudzuki T, Kössel H, Sugiura MJPotNAoS (1996)  
628 Creation of a novel protein-coding region at the RNA level in black pine  
629 chloroplasts: the pattern of RNA editing in the gymnosperm chloroplast is  
630 different from that in angiosperms. *Proc Natl Acad Sci U S A* 93  
631 (16):8766-8770. doi:10.1073/pnas.93.16.8766
- 632 Wan Y, Kertesz M, Spitale RC, Segal E, Chang HYJNRG (2011) Understanding the

- 633 transcriptome through RNA structure. *Nat Rev Genet* 12 (9):641-655.  
634 doi:10.1038/nrg3049
- 635 Wang C, Xu JR, Liu H (2016) A-to-I RNA editing independent of ADARs in  
636 filamentous fungi. *RNA Biol* 13 (10):940-945.  
637 doi:10.1080/15476286.2016.1215796
- 638 Wang H, Sun S, Ge W, Zhao L, Hou B, Wang K, Lyu Z, Chen L, Xu S, Guo JJS (2020)  
639 Horizontal gene transfer of Fhb7 from fungus underlies Fusarium head blight  
640 resistance in wheat. *Science* 368 (6493). doi:10.1126/science.aba5435
- 641 Xie C, Mao X, Huang J, Ding Y, Wu J, Dong S, Kong L, Gao G, Li CY, Wei L (2011)  
642 KOBAS 2.0: a web server for annotation and identification of enriched  
643 pathways and diseases. *Nucleic Acids Res* 39 (Web Server issue):W316-322.  
644 doi:10.1093/nar/gkr483
- 645 Zaffagnini M, Marchand CH, Malferrari M, Murail S, Bonacchi S, Genovese D,  
646 Montalti M, Venturoli G, Falini G, Baaden M, Lemaire SD, Fermani S, Trost P  
647 (2019) Glutathionylation primes soluble glyceraldehyde-3-phosphate  
648 dehydrogenase for late collapse into insoluble aggregates. *Proc Natl Acad Sci*  
649 U S A 116 (51):26057-26065. doi:10.1073/pnas.1914484116
- 650 Zhang S, Klessig DFJTips (2001) MAPK cascades in plant defense signaling. *Trends*  
651 *Plant Sci* 6 (11):520-527. doi:10.1016/s1360-1385(01)02103-3
- 652 Zhou Y, Chen Z, Cheng M, Chen J, Zhu T, Wang R, Liu Y, Qi P, Chen G, Jiang Q, Wei  
653 Y, Luo MC, Nevo E, Allaby RG, Liu D, Wang J, Dvorak J, Zheng Y (2018)  
654 Uncovering the dispersion history, adaptive evolution and selection of wheat  
655 in China. *Plant Biotechnol J* 16 (1):280-291. doi:10.1111/pbi.12770
- 656 Zhu Z, Hao Y, Mergoum M, Bai G, Humphreys G, Cloutier S, Xia X, He Z (2019)  
657 Breeding wheat for resistance to Fusarium head blight in the Global North:  
658 China, USA, and Canada. *The Crop Journal* 7 (6):730-738.  
659 doi:10.1016/j.cj.2019.06.003  
660

661 **Figure**

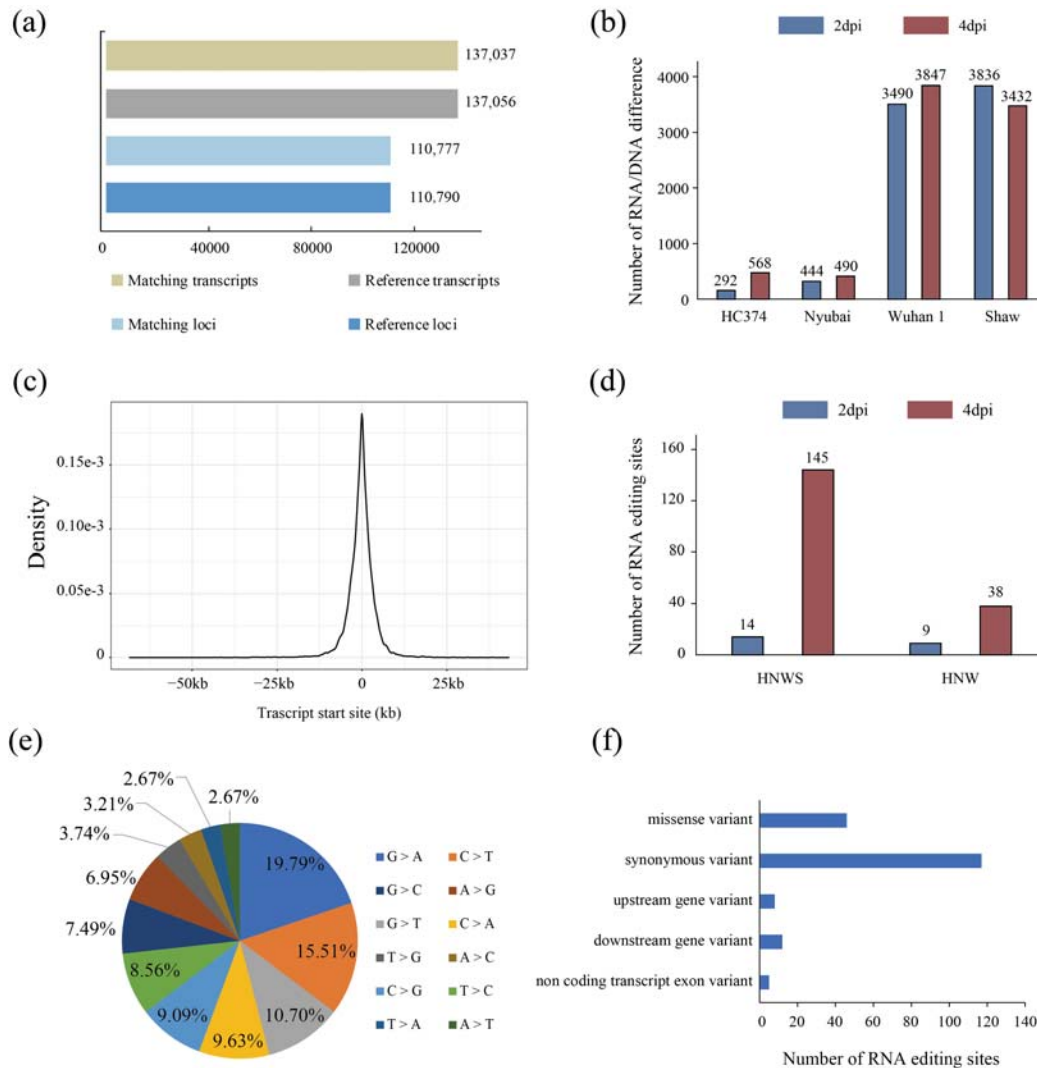

662

663 **Fig. 1 Characterization of DNA/RNA difference sites and RNA editing sites.** (a)  
 664 The assembled genes and transcripts based on the RNA-seq using in this study against  
 665 the wheat reference genome IWGSC v1.1. (b) The numbers of DNA/RNA difference  
 666 sites were identified in four wheat varieties at 2dpi and 4dpi, respectively. (c) The  
 667 distribution of DNA/RNA difference sites distance from TSS (transcription start site)  
 668 of its related genes. (d) The number of RNA editing sites shared by four varieties  
 669 (HNWS: HC374, Nyubai, Wuhan 1, Shaw) and three resistant varieties (HNW:  
 670 HC374, Nyubai, Wuhan 1). (e) Distribution of all unique RNA editing site types. (f)  
 671 Distribution of RNA editing sites by transcription regions. The y axis represents the  
 672 different types of regions, and the x axis shows the abundances of RNA editing sites  
 673

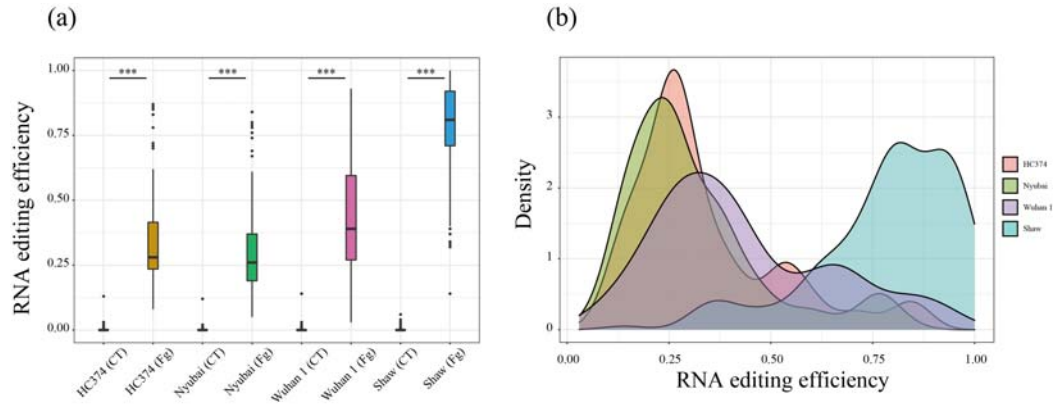

674

675

676

677

**Fig. 2 Comparison of RNA editing efficiency in different varieties (a) and the distribution of RNA editing efficiency (b).**



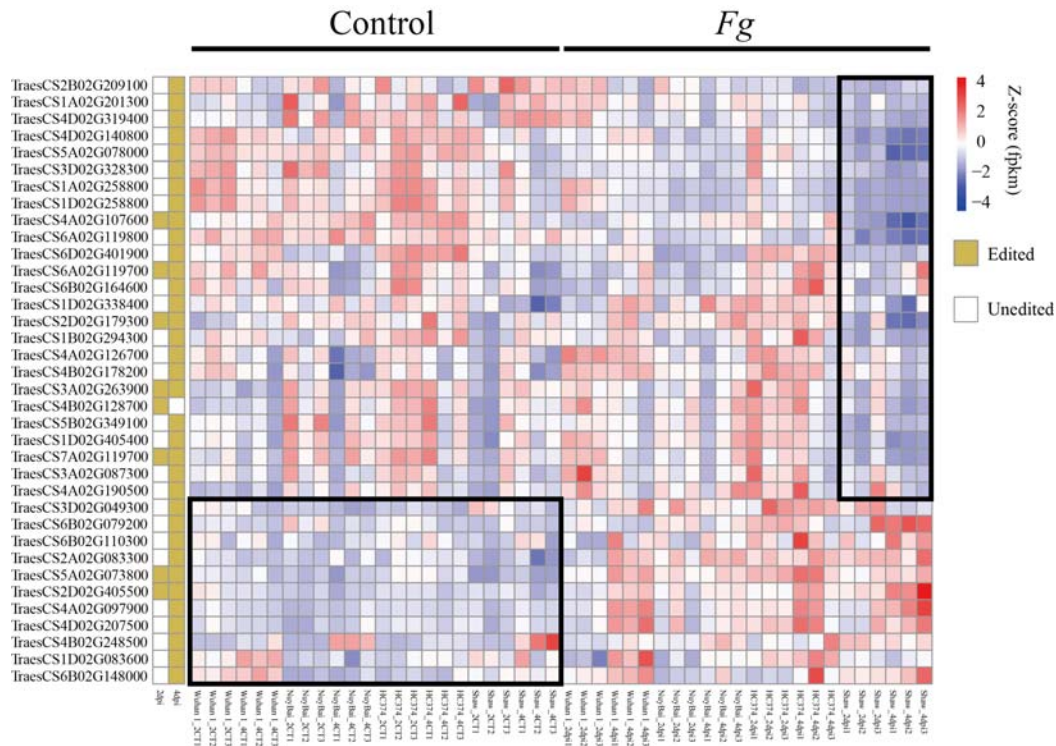

678

679

680

681

682

683

684

**Fig. 3 The expression profiles of the 36 candidate RNA editing genes among resistant and susceptible genotypes at two inoculation time points.** The left block diagram represents whether RNA editing occurred in these genes. Blank means no editing, while green means editing. The middle heatmap represents the expressions of these genes in four varieties. CT: Control group. dpi: days post inoculation

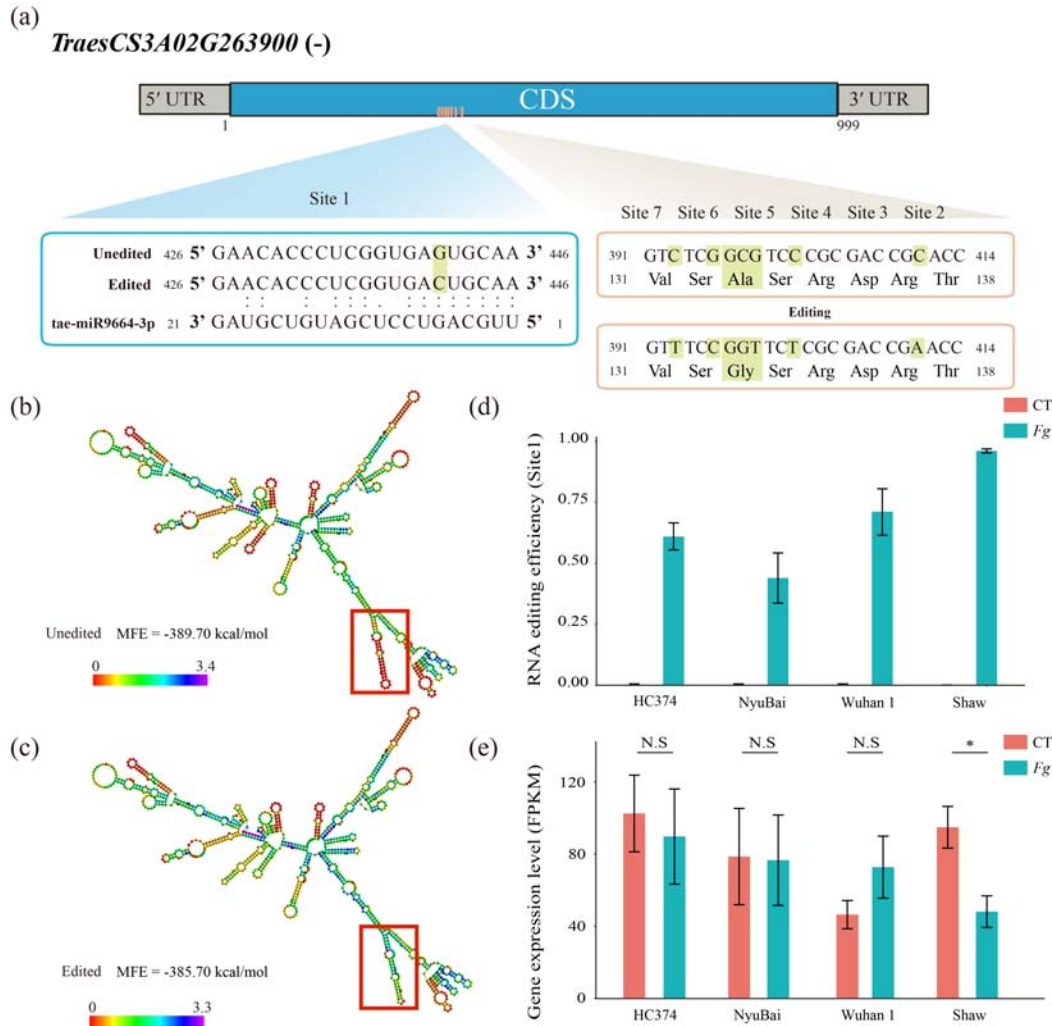

685

686 **Fig. 4 RNA editing effect on the miRNA targeting and RNA 2D structure on**  
 687 ***TraesCS3A02G263900*.** (a) Seven editing sites were identified in the coding region  
 688 of *TraesCS3A02G263900*, of which site 4 and 5 was in the same amino acid and  
 689 changed it, site 1 was found to changing the miRNA binding sites. (b) RNA secondary  
 690 structure of *TraesCS3A02G263900* before Site 1 editing. (c) RNA secondary structure  
 691 of *TraesCS3A02G263900* after Site 1 editing. (d) Editing efficiency of  
 692 *TraesCS1B02G294300* in four genotypes. (e) Expression levels of  
 693 *TraesCS1B02G294300* in four genotypes. \*, P value < 0.05; \*\*, P value < 0.01; \*\*\*,  
 694 P value < 0.001; N.S, not significant  
 695

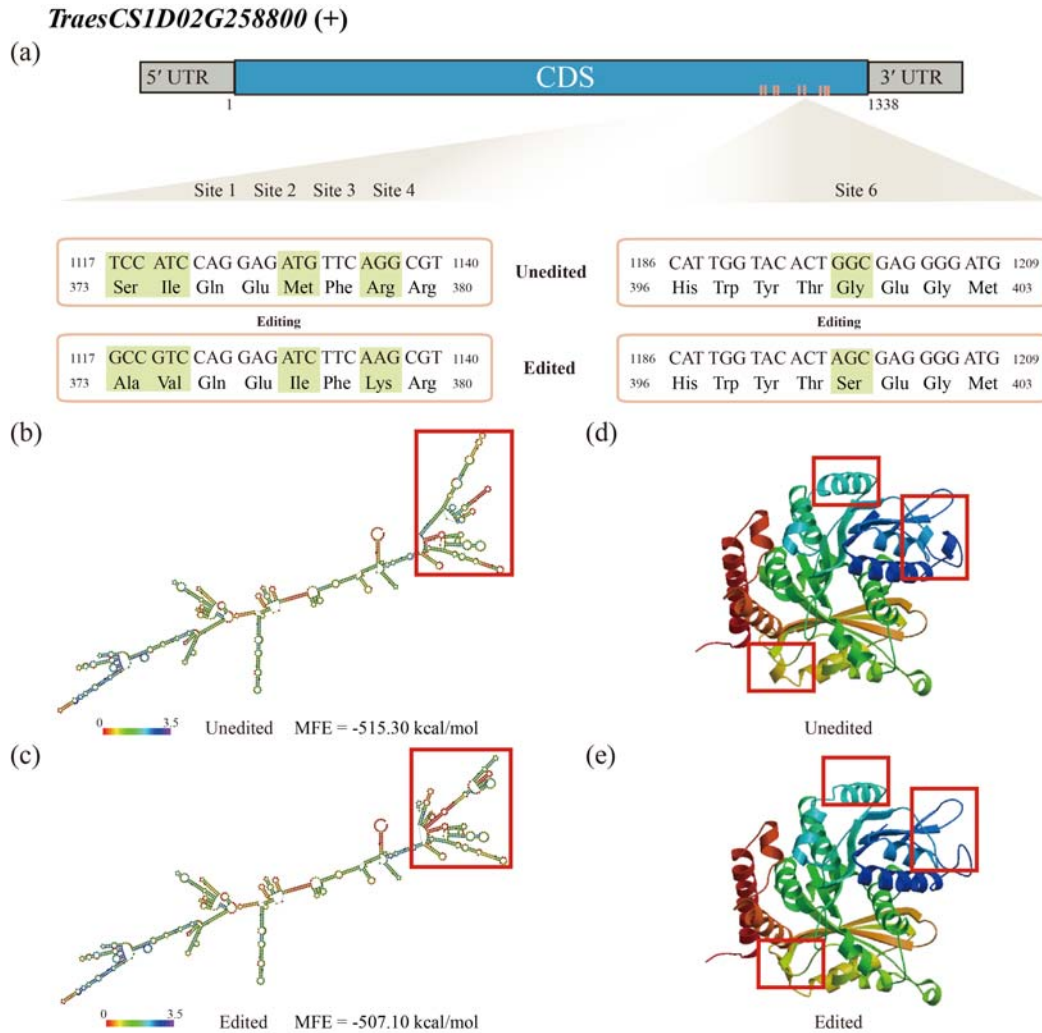

696

697

698

699

700

701

702

703

**Fig. 5 RNA editing effect on the mRNA 2D structure and protein 3D structure on *TraesCS1D02G258800*.** (a) There were nine RNA editing sites found in the coding region of *TraesCS1D02G258800*, of which site 1, 2, 3, 4 and 6 caused the amino acid change and then also changed its 3D structure. (b-c) RNA secondary structure of *TraesCS1D02G258800* before and after editing. (d-e) Protein 3D structure of *TraesCS1D02G258800* before and after editing

## **Supplementary materials**

**Fig. S1 Sample dendrogram and trait heatmap of WGCNA.** WGCNA was analyzed based on the expression level of the 58,380 expressed genes

**Fig. S2 Correlation of gene modules in WGCNA**

**Fig. S3 Correlation between gene modules and traits in WGCNA**

**Fig. S4 IGV results of RNA editing events in TraesCS3A02G263900.** (a) Site 1 in 4dpi of HC374. (b) Site 2-7 in 4dpi of HC374. (c) Site 1 in 4dpi of Nyubai. (d) Site 2-7 in 4dpi of Nyubai. (e) Site 1 in 4dpi of Wuhan 1. (f) Site 2-7 in 4dpi of Wuhan 1. (g) Site 1 in 4dpi of Shaw. (h) Site 2-7 in 4dpi of Shaw. The numbers on reads represent the editing efficiency of RNA editing sites in each sample. CT: Control group. Fg: Treatment group

**Fig. S5 IGV results of RNA editing events in TraesCS1D02G258800.** (a) Site 1-4 in 4dpi of HC374. (b) Site 5-9 in 4dpi of HC374. (c) Site 1-4 in 4dpi of Nyubai. (d) Site 5-9 in 4dpi of Nyubai. (e) Site 1-4 in 4dpi of Wuhan 1. (f) Site 5-9 in 4dpi of Wuhan 1. (g) Site 1-4 in 4dpi of Shaw. (h) Site 5-9 in 4dpi of Shaw. The numbers on reads represent the editing efficiency of RNA editing sites in each sample. CT: Control group. Fg: Treatment group

**Table S1. Summary of the identified DNA/RNA difference sites in this study.**

**Table S2. Message of RNA editing sites.**

**Table S3. Differential expressed level of RNA editing genes.**

**Table S4. Distribution of RNA editing genes in co-expression modules.**

**Table S5. Function enrichment of RNA editing genes.**

**Table S6. Minimum free energy (MFE) of RNA secondary structure of candidate editing genes.**

**Table S7. Prediction of the miRNA targeting sites of the RNA editing genes.**

**Table S8. Prediction of the conserved domain of the RNA editing genes.**

## Supplementary Figures

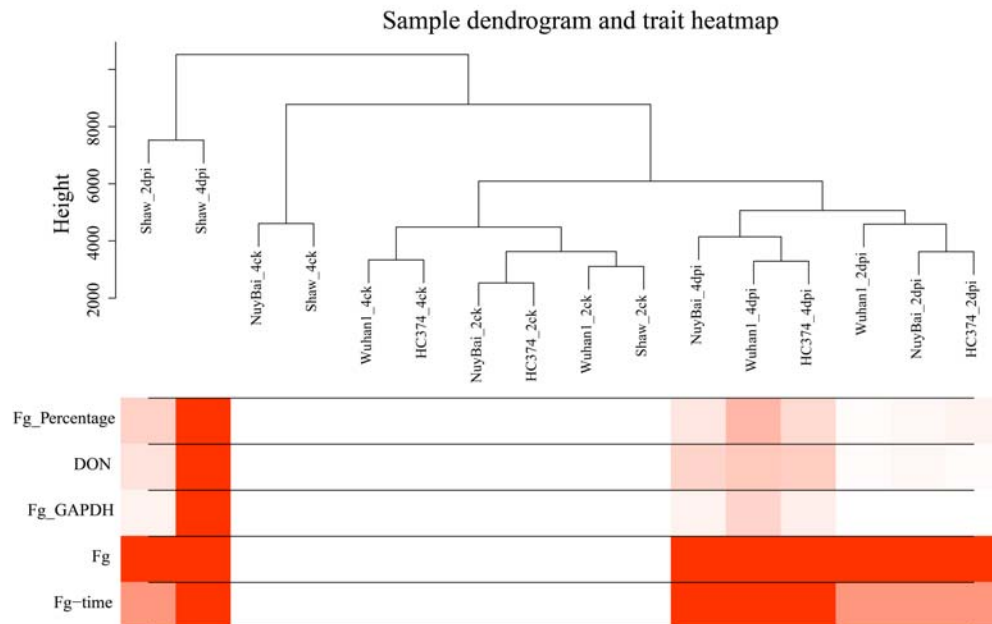

**Fig. S1 Sample dendrogram and trait heatmap of WGCNA.** WGCNA was analyzed based on the expression level of the 58,380 expressed genes

### Eigengene adjacency heatmap

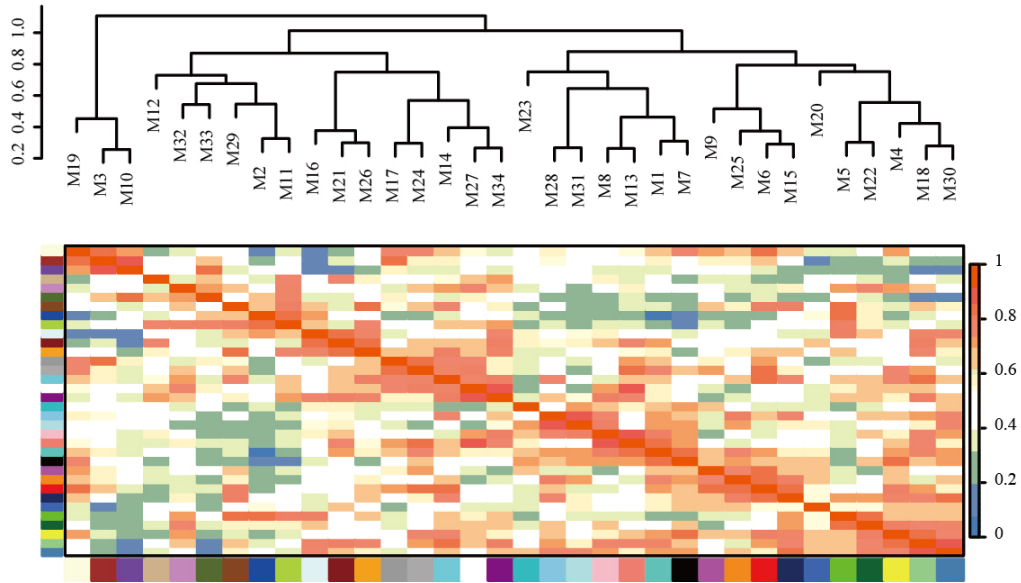

**Fig. S2 Correlation of gene modules in WGCNA**

### Module-trait relationships

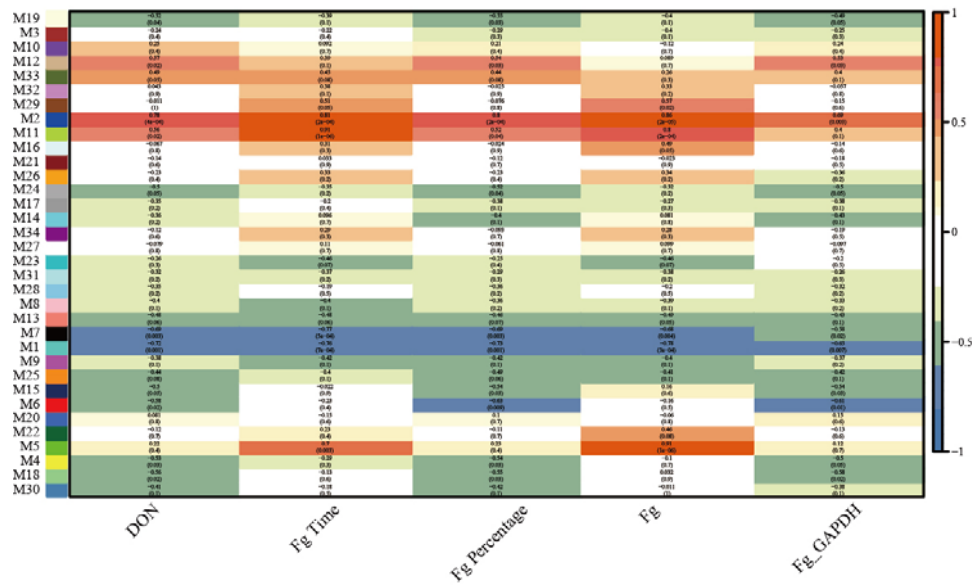

Fig. S3 Correlation between gene modules and traits in WGCNA

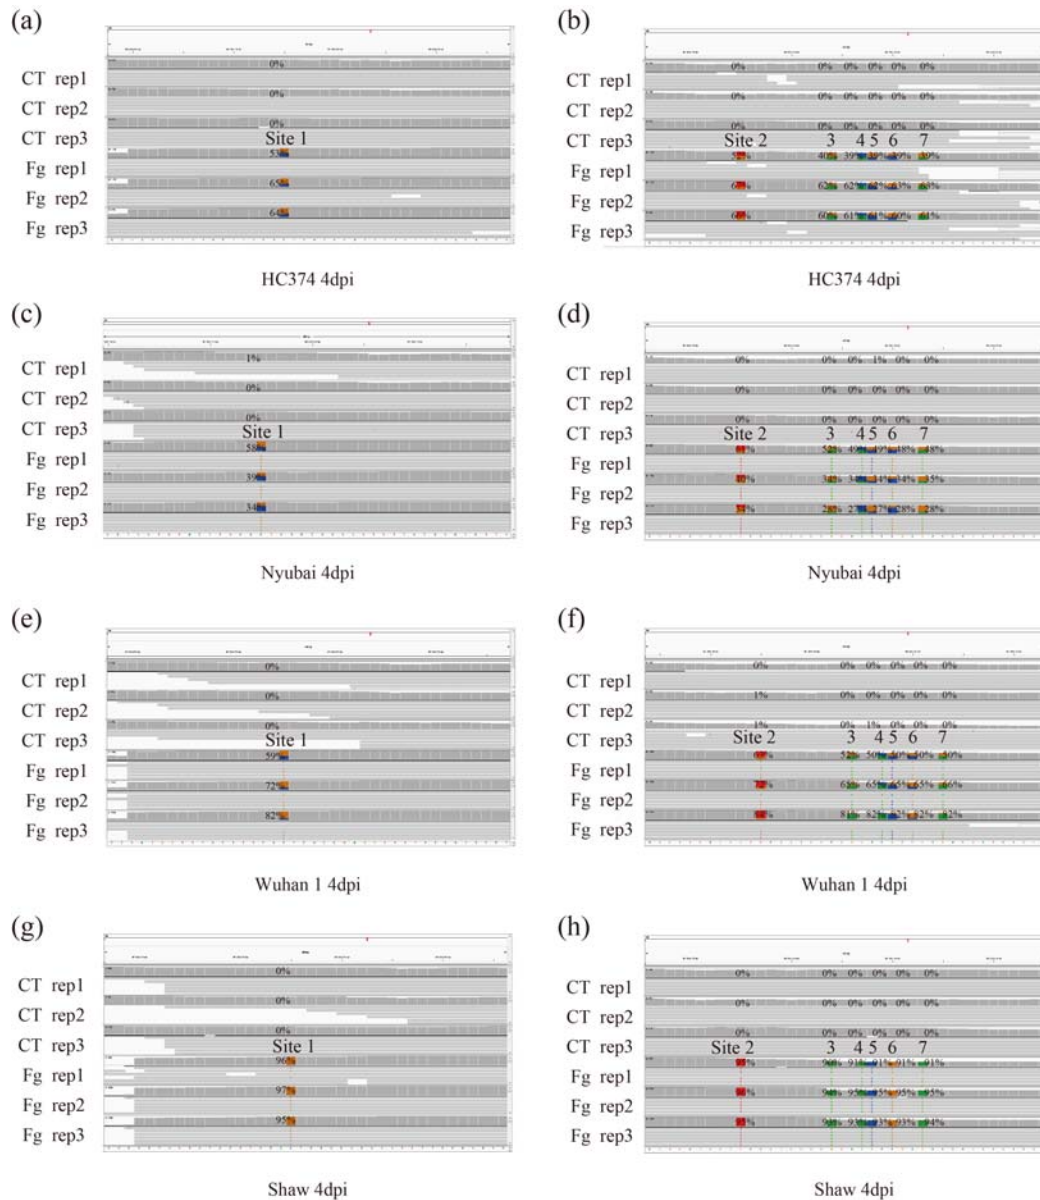

**Fig. S4 IGV results of RNA editing events in TraesCS3A02G263900.** (a) Site 1 in 4dpi of HC374. (b) Site 2-7 in 4dpi of HC374. (c) Site 1 in 4dpi of Nyubai. (d) Site 2-7 in 4dpi of Nyubai. (e) Site 1 in 4dpi of Wuhan 1. (f) Site 2-7 in 4dpi of Wuhan 1. (g) Site 1 in 4dpi of Shaw. (h) Site 2-7 in 4dpi of Shaw. The numbers on reads represent the editing efficiency of RNA editing sites in each sample. CT: Control group. Fg: Treatment group



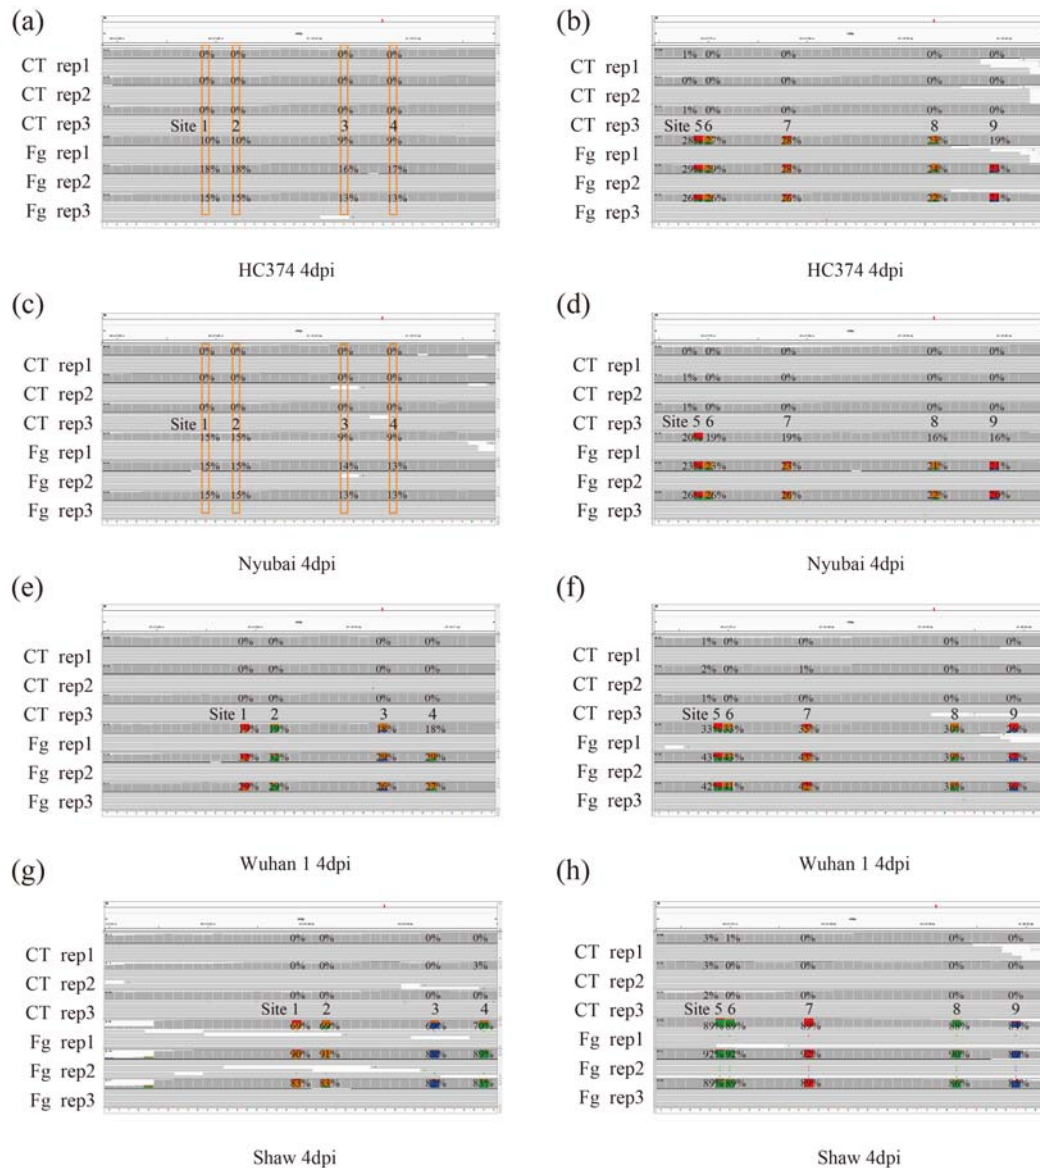

**Fig. S5 IGV results of RNA editing events in TraesCS1D02G258800.** (a) Site 1-4 in 4dpi of HC374. (b) Site 5-9 in 4dpi of HC374. (c) Site 1-4 in 4dpi of Nyubai. (d) Site 5-9 in 4dpi of Nyubai. (e) Site 1-4 in 4dpi of Wuhan 1. (f) Site 5-9 in 4dpi of Wuhan 1. (g) Site 1-4 in 4dpi of Shaw. (h) Site 5-9 in 4dpi of Shaw. The numbers on reads represent the editing efficiency of RNA editing sites in each sample. CT: Control group. Fg: Treatment group
